# Supplementary material for: Interferon-gamma and interleukin-10 genetic polymorphisms among the pulmonary tuberculosis caused by Malaysia-specific Mycobacterium tuberculosis strain: SIT745/EAI1-MYS
Source: PeerJ. 2025 Jun 5;13:e19576. doi: 10.7717/peerj.19576 (PMC12145778; doi:10.7717/peerj.19576)
Supplement: Supplemental Information 1 — Anonymized raw data used in the study. Each row represents an individual participant. The columns include subject classification (Malaysian TB patient, non-Malaysian TB patient, or healthy control), anonymized patient ID, IFN-γ and IL-10 genotypes, age, gender, smoking history, comorbidities, and TB clinical findings. [file peerj-13-19576-s001.xlsx]

## Sheet: Raw data anonymous TB IL10 IFN.
TYPE	ID	IFN	IL10	GENDER	RACE	AGE	OCCUPATION	SMOKING_HISTORY	COMORBIDITY	FAMILY_HISTORY	SMEAR_INDEX	FEVER	COUGH	NIGHT_SWEAT	LOW	SOB	CHEST_PAIN	HAEMOPTYSIS	CXR	TB_SEVERITY	YEAR_DIAGNOSIS
MYS	G2P1	AT	AA	Male	Malay	62	Unemployed	Ex-smoker	NKMI	Yes	+++	Yes	Yes	Yes	Yes	Yes	No	No	Unilateral	Moderate	2017-2022
MYS	G2P2	AA	AA	Male	Malay	46	Employed	Ex-smoker	DM	No	+	No	Yes	No	Yes	No	No	No	Unilateral	Mild	2017-2022
MYS	G2P3	TT	AA	Male	Malay	66	Retired	Active-smoker	DM / HPT	Yes	+	No	Yes	Yes	No	No	No	No	Unilateral	Mild	2017-2022
MYS	G2P4	AA	AA	Male	Malay	68	Employed	Ex-smoker	DM / HPT / KD	Yes	+	No	Yes	Yes	Yes	No	No	No	Unilateral	Mild	2011-2016
MYS	G2P5	TT	AA	Male	Malay	71	Employed	Active-smoker	DM	No	+++	Yes	Yes	Yes	No	Yes	No	No	Unilateral	Moderate	2017-2022
MYS	G2P6	AA	AG	Female	Malay	39	Employed	Non-smoker	NKMI	No	+	Yes	Yes	No	Yes	No	No	No	Bilateral	Severe	2017-2022
MYS	G2P7	AT	AG	Female	Malay	31	Unemployed	Non-smoker	NKMI	No	++	Yes	Yes	Yes	Yes	Yes	No	No	Bilateral	Severe	2011-2016
MYS	G2P9	AA	AG	Male	Malay	61	Employed	Active-smoker	DM / HPT	Yes	+	Yes	Yes	Yes	Yes	No	No	No	Unilateral	Moderate	2017-2022
MYS	G2P10	AA	AA	Male	Malay	60	Unemployed	Active-smoker	DM / HPT / Post-COVID	No	+++	Yes	Yes	Yes	Yes	No	No	Yes	Unilateral	Severe	2017-2022
N-MYS	G3X1	AA	AA	Male	Malay	24	Student	Active-smoker	NKMI	No	+	Yes	Yes	No	Yes	Yes	Yes	No	Unilateral	Moderate	2017-2022
N-MYS	G3X2	AT	AA	Female	Malay	66	Unemployed	Non-smoker	DM / HPT	No	+	Yes	Yes	No	Yes	Yes	No	No	Unilateral	Moderate	2017-2022
N-MYS	G3X3	AT	AA	Female	Malay	68	Unemployed	Non-smoker	DM / HPT / KD	No	+	Yes	Yes	No	Yes	Yes	Yes	No	Unilateral	Moderate	2017-2022
N-MYS	G3X4	AT	AA	Female	Malay	55	Employed	Non-smoker	DM / HPT	No	++	Yes	Yes	No	No	Yes	No	Yes	Unilateral	Severe	2017-2022
N-MYS	G3X5	AA	AG	Female	Malay	25	Student	Non-smoker	NKMI	No	+++	Yes	Yes	No	Yes	Yes	No	No	Unilateral	Moderate	2017-2022
N-MYS	G3X6	AT	AA	Female	Malay	26	Employed	Non-smoker	NKMI	No	+	Yes	Yes	No	No	No	No	No	Unilateral	Mild	2017-2022
N-MYS	G3X7	TT	AG	Male	Malay	56	Retired	Ex-smoker	DM / HPT	No	+++	Yes	Yes	No	Yes	No	No	Yes	Unilateral	Severe	2017-2022
N-MYS	G3X8	AT	AA	Female	Malay	62	Unemployed	Non-smoker	HPT	Yes	Healthy Control	Yes	No	No	No	No	No	No	Unilateral	Mild	2011-2016
N-MYS	G3X9	AA	AA	Female	Malay	49	Employed	Non-smoker	DM / HPT	No	+++	Yes	Yes	No	No	No	No	No	0	Mild	2011-2016
N-MYS	G3X10	TT	AA	Female	Malay	55	Employed	Non-smoker	DM / HPT / KD	No	+	Yes	Yes	No	No	No	No	No	0	Mild	2017-2022
Control	G1C1	AA	AA	Female	Malay	24	Employed	Non-smoker	7	No	Healthy Control	No	No	No	No	No	No	No	0	0	Healthy Control
Control	G1C2	AT	AA	Female	Malay	33	Student	Non-smoker	7	No	Healthy Control	No	No	No	No	No	No	No	0	0	Healthy Control
Control	G1C3	AA	AA	Female	Malay	30	Student	Non-smoker	7	No	Healthy Control	No	No	No	No	No	No	No	0	0	Healthy Control
Control	G1C4	AT	AA	Female	Malay	29	Student	Non-smoker	7	No	Healthy Control	No	No	No	No	No	No	No	0	0	Healthy Control
Control	G1C5	AA	AA	Female	Malay	41	Employed	Non-smoker	7	No	Healthy Control	No	No	No	No	No	No	No	0	0	Healthy Control
Control	G1C6	AT	AA	Male	Malay	45	Employed	Active-smoker	7	No	Healthy Control	No	No	No	No	No	No	No	0	0	Healthy Control
Control	G1C7	AA	AA	Male	Malay	53	Employed	Non-smoker	7	No	Healthy Control	No	No	No	No	No	No	No	0	0	Healthy Control
Control	G1C8	AT	AA	Male	Malay	60	Retired	Non-smoker	7	No	Healthy Control	No	No	No	No	No	No	No	0	0	Healthy Control
Control	G1C10	AA	AA	Male	Malay	60	Retired	Non-smoker	7	No	Healthy Control	No	No	No	No	No	No	No	0	0	Healthy Control
